1 **Flow cytometry with cell sorting and sequencing as a tool for**  
2 **the study of the Humboldt Current krill stomach microbiota**

3  
4 Carlos Henriquez-Castillo<sup>1,2</sup>, Belén Franco-Cisterna<sup>3,5</sup>, Alejandro A. Murillo<sup>4</sup>, Osvaldo Ulloa<sup>1,2</sup>,  
5 and Ramiro Riquelme-Bugueño<sup>1,6\*</sup>

6  
7 <sup>1</sup> Instituto Milenio de Oceanografía (IMO), Universidad de Concepción, PO Box 160 C,  
8 Concepción, Chile

9 <sup>2</sup> Departamento de Oceanografía, Facultad de Ciencias Naturales y Oceanográficas,  
10 Universidad de Concepción, PO Box 160 C, Concepción, Chile

11 <sup>3</sup> Programa de Magister en Ciencias mención Oceanografía, Facultad de Ciencias  
12 Naturales y Oceanográficas, Universidad de Concepción, PO Box 160 C, Concepción,  
13 Chile

14 <sup>4</sup> Structural and Computational Biology Unit, European Molecular Biology Laboratory  
15 (EMBL), Heidelberg, Germany

16 <sup>5</sup> Nordcee, Department of Biology, University of Southern Denmark, Odense, Denmark

17 <sup>6</sup> Departamento de Zoología, Facultad de Ciencias Naturales y Oceanográficas,  
18 Universidad de Concepción, PO Box 160 C, Concepción, Chile

19

20

21 **Corresponding Author:**

22 Ramiro Riquelme-Bugueño

23 Departamento de Zoología, Facultad de Ciencias Naturales y Oceanográficas,

24 Universidad de Concepción, PO Box 160 C, Concepción, Chile

25 Email address: [rriquelm@udec.cl](mailto:rriquelm@udec.cl)

## 26 **ABSTRACT**

27 Euphausiids (or krill) are important contributors to marine biomass and key players in marine  
28 pelagic trophic webs. Euphausiids stomachs represent a specific niche for microbes that  
29 participate in the digestion of the host dietary components. To date, methods for the study of the  
30 diversity and function of these microorganisms remain complex. Often, bacterial ribosomal  
31 sequences obtained from lysates of stomachs are overrepresented by organisms from the  
32 surrounding environment. Flow cytometry with cell sorting (FC-CS) have become a powerful  
33 technique to study microbial community structure but also for the study of population genomics  
34 of gut-associated bacteria, even at a single-cell level.

35 In this study, we used FC-CS and sequencing of the bacterial 16S rRNA gene to study the  
36 microorganisms inhabiting the stomach of the Humboldt Current krill, *Euphausia mucronata*.  
37 This approach was complemented with DNA extraction and sequencing from whole lysate  
38 stomachs as described for other crustacean species.

39 Non-specific amplification was not retrieved in the polymerase chain reaction (PCR) from cells  
40 sorted, opposite to the observed using the DNA from the whole lysate. Sequences obtained from  
41 the whole stomach DNA were enriched in picocyanobacteria, meanwhile, sequences retrieved  
42 from cells sorted belonged almost exclusively to *Balneola* sp. of the new phylum, Balneolaeota.  
43 This study represents, to our knowledge, the first report of *Balneola* sp. in the stomach for any  
44 organism inhabiting the Humboldt Current System (HCS).

45 Our results suggest that the stomach-associated microbiota can be characterized by FC-CS and  
46 sequencing by manual scraping of the stomach coupled with the DNA extraction and sequencing.  
47 This work represents a baseline for similar studies of other mesozooplankton groups. The

48 implementation of this technique might complement future studies on host-microbes' interaction  
49 and their implications on the marine pelagic food web.

50

## 51 INTRODUCTION

52 Krill are small zooplankton crustaceans found across the world's oceans. Like other  
53 zooplankton groups, their stomachs represent a specific niche for diverse microorganisms which  
54 normally differ from the microbial communities in the surrounding seawater (*Tang et al., 2010*).  
55 Zooplankton bodies offer protection and an organic-rich micro-environment for the attached-  
56 bacteria (*Tang et al., 2010*), whereas bacteria can provide different metabolisms for maintaining  
57 the health of the host animals (*Shoemaker and Moisander, 2017*).

58 One of the most studied krill species is the Antarctic krill *Euphausia superba*, where  
59 bacterial growth occurs in the krill stomach's, which is an important component of the entire  
60 digestive process of euphausiids. Bacterial growth in krill (*E. superba*) stomach has been  
61 suggested based on electron micrographs (*Rakusa-Suszczewski, 1988*). Also, diverse studies have  
62 been focused in the characterization of bacteria from krill stomach through different  
63 methodologies. These include: spread plate count method (*Kelly et al., 1978; Fevolden & Eidså,*  
64 *1981; Donachie & Zdanowski, 1998*), acridine orange direct count under epifluorescence  
65 microscopy (*Fevolden & Eidså, 1981*), identification of cell sizes and morphology with optical  
66 and scanning electron microscopy (*Kawaguchi & Toda, 1997*), isolation and cultivation  
67 (*Donachie et al., 1995; Denner et al., 2001; Cui et al., 2016*), chromatographic analyses of  
68 bacterial proteins and enzymatic activity measurements with microassays (*Donachie et al.,*  
69 *1995*), and recently, the characterization of the bacterial diversity on the krill tissue has been  
70 done by using high-throughput sequencing (*Clarke et al., 2019*).

71           In the Humboldt Current System (HCS), one of the most productive marine systems in  
72 the world, the most abundant and endemic krill species is *Euphausia mucronata*. Its habitat is  
73 mainly restricted to the continental shelf in the coastal upwelling zones (*Riquelme-Bugueño et*  
74 *al., 2012*), where it has a high population density and biomass, contributing to the carbon cycling  
75 (*Gonzalez et al., 2009; Antezana, 2010; Riquelme-Bugueño et al., 2013*). These characteristics  
76 and their ecological role have recently prompted research in order to further our understanding  
77 about this species (*Gonzalez & Quiñones, 2002; Riquelme-Bugueño et al., 2015, 2016a,b*). Even  
78 though there has been quite a bit of progress in the study of krill ecology and physiology, little  
79 progress has been made in the last few years about the relationship between this krill species and  
80 their stomach-associated bacteria in the HCS, compared to the extensive analysis done for *E.*  
81 *superba* (Schmidt & Atkinson 2016).

82           To fill this gap and contribute to the study of *E. mucronata* stomach-microbiome, we  
83 used a complementary approach utilizing Flow cytometry and cell sorting (FC-CS) together with  
84 a conventional tissue DNA extraction, to assess the composition of the stomach microbial  
85 community. Flow cytometry is a high-precision technique that has been used intensively in  
86 microbiology since the early 1990s (*Amann et al., 1990*). It represents a specific approach for the  
87 counting of microbial cells. The cell-sorting capacity also enables further molecular analysis,  
88 allowing it to specifically characterize and quantify the microbiota component and predict its  
89 phylogenetic relationships. Flow cytometry and cell sorting (FC-CS) have become powerful  
90 techniques to study microbial community structure and population genomics of gut-associated  
91 bacteria at a single-cell level (*Koch et al., 2013; Engel et al., 2014*). In this work, we propose the  
92 use of Flow cytometry along with cell sorting to study the stomach-associated microorganisms of  
93 zooplankton species, in order to better understand the microbial composition of this largely

94 unexplored ecological niche. We used the Humboldt Current Krill *E. mucronata*, as a study  
95 model in order to identify the microorganisms that are present in the krill stomach as well as  
96 their phylogeny. We also sought to explore new applications of flow cytometry in zooplankton  
97 ecology and the information that can be drawn from this technique.

98

## 99 **MATERIALS & METHODS**

### 100 **Sampling**

101         Sampling was carried out on March 2, 2016, at Station 18, located over the continental  
102 shelf off coast of central Chile (36.5°S, 73.1°W; seafloor 94 m depth) (Fig. S1). Physicochemical  
103 parameters were obtained using a conductivity-temperature-depth (CTD) SB911E profiler,  
104 equipped with an additional fluorescence sensor. Water samples were collected at night, using  
105 10-L Niskin bottles on-board the R/V Kay Kay II (Department of Oceanography, University of  
106 Concepcion). The zooplankton was sampled from a depth of 50 m of the surface with a WP-2  
107 standard plankton net (mesh size of 200 µm) and non-filtering cod ends. Once on board, live  
108 individuals were transported immediately to the laboratory for subsequent analyses. For flow  
109 cytometry analysis, of the planktonic free-living microbial community, 1.5 mL of seawater  
110 samples (in triplicates) were taken from 5, 10, 20, 50, 65, and 80 m depth, and were fixed on  
111 board with 10% dimethyl sulfoxide (DMSO) plus 0.05% of pluronic acid, maintained at room  
112 temperature for 20 min and quickly frozen in liquid nitrogen. The fixed samples were stored at -  
113 20° C until the analysis was performed.

114

115

116

## 117 **Krill stomach dissection and analyses**

118           Specimens of *E. mucronata* were identified and separated (3 live individuals per  
119 analysis), washed with 0.2 µm filtered sterile seawater in sterile petri dishes under a laminar flow  
120 hood. Individuals were dissected, and their stomachs were extracted using sterile tweezers and  
121 scraped under a Stereo Discovery V8 zoom stereomicroscope (Zeiss). The stomachs were  
122 washed, dissected, and the content from three stomachs was pooled and re-suspended in 1 mL of  
123 sterile filtered seawater (Fig. 1) containing 10% of DMSO for flow cytometry analysis. Cell  
124 suspension was passed through a cell strainer (70-µm mesh) to remove particles that can clog the  
125 sample line of the flow cytometer and it was then stored in 1.5 mL sterile centrifuge tubes.  
126 Another set of three krill stomachs was dissected and stored in sterile 1.5 mL centrifuge tubes at  
127 -20° C for further DNA extraction. The genomic DNA was extracted from intact stomachs using  
128 the NucleoSpin Tissue XS kit (Macherey-Nagel®). The integrity of the DNA was checked in a  
129 1% agarose gel, and the concentration was determined using a Qubit fluorometer V 1.27  
130 (Invitrogen®). The DNA was then stored at -20° C until amplification.

131

## 132 **Flow cytometry and cell sorting analysis**

133           Picoplankton in the water column was enumerated using a high-performance InFlux®  
134 flow cytometer (Becton Dickinson, formerly Cytopeia). Autofluorescent particles were identified  
135 by their red fluorescence, detected at 692/40 nm using three excitation lasers (457 nm, 488 nm,  
136 and 532 nm). For heterotrophic cells counts, samples were fixed with DMSO (10% final  
137 concentration), stained with the DNA dye SYBR Green I, as described in Marie et al. (*Marie et*  
138 *al., 1997*), and they were differentiated by light scatter (forward angle light scatter, FALS).  
139 SYBR Green I fluorescence was detected at 530/15 nm using a 488-nm excitation laser (Fig. 3).

140 Each cytometer run was calibrated with 1 mm diameter fluorescent Ultra Rainbow beads  
141 (Spherotech Inc.). 100  $\mu$ L for autofluorescent cells and 75  $\mu$ L for heterotrophic cells were run at  
142 an average flow rate of 20  $\mu$ L  $\text{min}^{-1}$  and monitored with a liquid flowmeter (Sensirion US). The  
143 events were recorded with Spigot software (Cytopenia), and FlowJo software v7.6.1 (Tree Star  
144 Inc.) was used for data analysis. Positive events for SYBR Green I fluorescence (530/20 nm) in  
145 stomach samples were sorted in the purity mode. The cytometer was configured in a two-tube  
146 mode, the sort chamber was UV sterilized, and  $2 \times 10^4$  cells from stomach samples were sorted  
147 into 1.5 mL sterile centrifuge tubes. Cells were centrifuged at 10,000 rpm for 10 min. The  
148 supernatant was removed, and the cells were re-suspended in 16.85 mL of ultrapure nuclease-  
149 free water (IDT technologies) and stored at  $-20^\circ\text{C}$  until analysis (Fig. 3).

150

#### 151 **Polymerase chain reaction (PCR) conditions**

152 The 16S rRNA gene was amplified using the eubacterial 358F 5'-  
153 CCTACGGGAGGCAGCAG-3' (Muyzer *et al.*, 1993) and 907RM 5'-  
154 CCGTCAATTCMTTGTGAGTTT-3' (Muyzer & Smalla, 1998) primer pairs. The PCR  
155 amplifications were carried out with a total reaction volume of 25  $\mu$ L per sample. Each mix  
156 contained 0.5 mM dNTPs, 0.75 mM  $\text{MgCl}_2$ , 0.2  $\mu$ M of each primer, 1 U of Taq polymerase, and  
157 1X Go taq buffer (Kappa Biosystems, Wilmington, MA, USA). For total community PCR, 20 ng  
158 of stomach-extracted DNA was added. A mixture of the reagents was added directly into the tube  
159 containing the cells for the sorted samples. The amplification conditions consisted of initial  
160 denaturation at  $95^\circ\text{C}$  for 5 min, followed by 30 cycles at  $94^\circ\text{C}$  for 30 s, at  $52^\circ\text{C}$  for 30 s, and at  
161  $72^\circ\text{C}$  for 1 min, with a final extension at  $72^\circ\text{C}$  for 10 min.

162

163 **Cloning, sequencing and phylogenetic analyses**

164 The clone libraries were constructed from the PCR products, obtained from the DNA of  
165 both the whole-stomach microbial communities and the sorted populations, using the pGEM®-T  
166 easy Vector System (Promega). Duplicate PCR products from the samples were pooled and  
167 purified with the Wizard® Gel and PCR Clean-Up System (Promega), ligated and subsequently  
168 cloned into *E. coli* JM109 competent cells, following the manufacturer's specifications  
169 (Promega). After a PCR screening was conducted, selected clones with the correct size were  
170 sequenced at Macrogen Inc. (Korea), and the sequences were deposited in GenBank under the  
171 accession numbers MG010923-MG011103.

172 The sequences retrieved in this work were quality filtered and then locally aligned against  
173 the latest Bacterial and Archaeal 16S rRNA database from the National Center for  
174 Biotechnology Information (NCBI), in addition to the IMG-ER annotated genomes using  
175 MEGABLAST. For Balneolales order phylogeny, operational taxonomic units (OTUs) having a  
176 sequence similarity of 97% and ones that matched Balneolales were aligned against reference  
177 sequences using SSU-Align. Phylogenetic reconstructions were performed on 560 aligned  
178 nucleotides. The phylogeny was inferred by the maximum likelihood (ML) method, using the  
179 generally time reversible parameter and assuming a discrete gamma distribution (GTR+G). The  
180 model was selected according to the Bayesian and Akaike information criterion, using the  
181 JModel test 2.1.3 (*Darriba et al., 2012*). The phylogenetic inference by ML was done with  
182 BOSQUE Software (*Ramirez-Flandes & Ulloa, 2008*). The topologies of the trees were obtained  
183 after ML analyses were done, and the robustness of inferred topologies were supported from 100  
184 nonparametric bootstrap samplings for ML. The tree was drawn with iTOL (*Letunic & Bork,*  
185 *2006*). To detect *Balneola*-related sequences from the study area, 16S rRNA bacterial sequences



186 from the HCS were retrieved from NCBI (Accession numbers: KM461719, KM461941,  
187 DQ810296 and DQ810787.1; respectively n = 700). The sequences were locally aligned against  
188 our dataset by using MEGABLAST.

189

## 190 **Genomic potential of *Balneola* DSM 17893 and *Balneola* sp. EhC07**

191 Cell motility, adhesion, and polymer degradation genes were searched in the available  
192 genome for *Balneola* DSM 17893 through the IMG-ER platform (<https://img.jgi.doe.gov>). Genes  
193 for *Balneola* sp. EhC07 were searched using the draft genome sequence, available under the  
194 GenBank accession number LXYG00000000.1.

195

## 196 **RESULTS**

### 197 **Oceanographic setting**

198 Photosynthetically active radiation (PAR) was  $1.7 \mu\text{E m}^{-2} \text{s}^{-1}$  at surface strongly  
199 diminishing to  $1 \mu\text{E m}^{-2} \text{s}^{-1}$  within the first 5 m of the water column. From this depth, PAR subtly  
200 decreased at a rate of  $0.002 \mu\text{E m}^{-2} \text{s}^{-1}$  until 80 m. The above coincides with the peak of  
201 fluorescence, around 5 m depth, declining to zero at 20 m. Also, the oxygen concentration  
202 declined rapidly in the first 20 m of the water column, establishing an oxygen minimum zone  
203 (OMZ) from 20 m until the sea bed ( $< 1 \text{ mL/L}$  or  $\sim 20 \mu\text{M}$  of dissolved oxygen). The bacterial  
204 abundance presented two peaks, the first at 5 m depth, with a decline at the oxycline and a  
205 second peak around 65 m depth, in the core of the OMZ. The temperature varied from  $13.5^\circ \text{C}$  at  
206 the surface to  $11.5^\circ \text{C}$  at 80 m depth, with the thermocline (observed from 5 to 20 m) coinciding  
207 with the oxycline and showing a stratification of the water column (Fig. S1). This profile match

208 with the upwelling conditions observed at that station during that season over time (*Sobarzo et*  
209 *al., 2007*).

210

### 211 **Flow cytometry analyses of the water column and krill stomachs**

212 Different groups of autofluorescent picoplankton were observed, mainly in surface waters  
213 of the study area, including small photosynthetic eukaryotes and picocyanobacteria that differs in  
214 their pigment properties (Fig. 2A). These groups of autofluorescent organisms were not observed  
215 in the stomach samples (Fig. 2C), suggesting a niche differentiation between the water column  
216 and the krill stomach. In contrast, a clear fluorescent signature was observed in the stomach  
217 samples when stained with the DNA dye Sybr Green I (Fig. 2D), and this pattern differed in their  
218 optical properties to the patterns observed through the water column (Fig. 2B; Fig. S2). A  
219 specific aggregation of cells of similar optic characteristics was selected for cell sorting,  
220 indicated by the dotted line circle in figure 2, cytogram in panel D.

221

### 222 **PCR amplification and sequencing of sorted cells and extracted DNA**

223 Flow cytometry positive events for Sybr Green I fluorescence (dotted circle in Fig. 2D)  
224 were sorted and subjected to amplification of the bacterial 16S rRNA gene. The sorting  
225 procedure allowed for a specific amplification of the 16S rRNA gene fragment, contrary to the  
226 PCR products of multiple sizes obtained from the stomach-extracted DNA (Fig. S3). Most of the  
227 sequences retrieved from the amplification of the 16S rRNA gene, from the whole-stomach DNA  
228 extraction, were affiliated to picocyanobacteria (60.4%, n=52). Other genera found in this DNA  
229 sample, belonging to phylum Proteobacteria, where *Halioglobus*, *Tateyamaria*, *Sulfitobacter*,  
230 *Roseobacter*, and *Paracoccus* among others (Table 1). While sequences obtained from sorted

231 stained cells from the pool of the three stomachs belonged almost exclusively to *Balneola* sp.  
232 (96.4%, n=80), a member of the recently defined phylum Balneolaeota. The closest cultured  
233 organisms corresponded to *Balneola* DG1502, a symbiont of the coccolithophore *Coccolithus*  
234 *pelagicus* f. *braarudii*, and *Balneola* sp. EhC07, a symbiont of the coccolithophore *Emiliana*  
235 *huxleyi* (Fig. 3), which were isolated from the South Pacific Ocean (*Green et al., 2015*).

236

## 237 **DISCUSSION**

238 The methodology used in this study, allowed us targeting specific bacterial populations  
239 from stomach samples based on their optical properties. Stomach-associated bacteria can be  
240 characterized by FC-CS and sequencing by manual scraping of the stomach, complemented with  
241 the DNA extraction and sequencing from the whole euphausiids' stomachs. In this way, the  
242 optical properties of the stained cells indicated that sorted cells remained intact, inferred by the  
243 diameter measured with FALS parameter, and did not represent degraded DNA material,  
244 supporting the suitability of this methodology for an accurate analysis of the bacterial  
245 community from the stomach.

246 The intricate environment inside the krill stomach (*Ullrich et al., 1991*), probably fosters  
247 the development of unique niches for particular microorganisms. *Balneola* sp. EhC07 and  
248 *Balneola vulgaris* DSM 17893, whose genome information is available, contains a genetic  
249 repertoire for twitching (NCBI accession numbers: WP 018126390 and WP 066223579) and  
250 gliding motility (NCBI accession numbers: WP 018127305.1 and WP 066218663.1). These  
251 capacities favor physical contact of the bacteria with the host cells (*Tuson & Weibel, 2013*) and  
252 represent an advantage against the very intricate structure of euphausiids' stomachs, as described  
253 for the Antarctic krill (*Ullrich et al., 1991*). Members of the order Balneolales have been found

254 in different marine habitats. However, *Balneola* sp. have not been reported to be a free-living  
255 organism in the HCS (*Aldunate et al., 2018; Stevens & Ulloa, 2008*). Nevertheless, *Balneola*  
256 *alkaliphila* strain CM41\_14b has been observed and isolated from surface waters, in the coastal  
257 north-western Mediterranean Sea (*Urios et al, 2008*). The functional capacities present in  
258 *Balneola* sp. for host colonization have also been reported in a wide range of plant and animal  
259 pathogens as well as in the formation of biofilms and fruiting bodies (*Green et al., 2015; Mattick,*  
260 *2002; Rosana et al., 2016*). For example, *Balneola* sp. display the same capacities that are  
261 observed in *Polaribacter* spp., belonging to the phylum Bacteroidetes, which form an important  
262 part of the microbiota of marine organisms, especially in the gastrointestinal tract (*Moisander et*  
263 *al., 2015; Thomas et al., 2011*).

264 The lack of *Balneola*-related sequences in the whole stomach-extracted DNA may be  
265 related to the complexity of the euphausiids' stomach (*Ullrich et al., 1991*) as well as  
266 methodological issues like the absence of a scraping of the stomachs prior the DNA extraction. It  
267 is possible that microorganisms were strongly attached to the stomach cells and cannot be  
268 disaggregated during extraction. Nevertheless, in the sorting approach, cell removal might be  
269 more efficient by scraping the stomach mucosa with a scalpel. This technique could facilitate cell  
270 recovery from the stomach tissue and, therefore, representing a technique improvement to study  
271 attached bacterial cells. The methodology used in this work allowed us to detect organisms that  
272 were not present in sequence libraries. Nevertheless, transcriptomic or stable isotopes analysis  
273 for the study of *in situ* activity are necessary to establish direct associations.

274 Microorganisms associated with the zooplankton digestive tract can be classified as  
275 resident, when bacteria are persistently present in the gut, and transient when bacteria do not  
276 form stable populations within the gut (*Tang et al., 2010*). In that sense, as cyanobacteria

277 normally occur in the water column of the study area (*Iriarte et al., 2012*) and they are mainly  
278 grazed by nano and microplankton (*Böttjer & Morales, 2005*), its high abundance detected from  
279 the whole stomach-extracted DNA may represent transient microbiota passing through the  
280 digestive tract of krill during feeding. Whereas, *Balneola* sp. detected from sorted stained cells  
281 exhibit capacities favoring the physical contact with the host cells, therefore may be part of the  
282 resident bacteria associated with the Humboldt Current Krill. Nevertheless, experimental  
283 evidence is required to support this hypothesis.

284 The uses of different methodologies that can complement each other, such as flow  
285 cytometry with cell sorting coupled with whole stomach-extracted sequencing is proposed. The  
286 use of FC-CS can be also couple to high-throughput sequencing, to uncover the population  
287 diversity of groups of microorganisms with similar optic characteristics but with low abundance,  
288 and for single-cell genomics (SCG), isolating singular components of the community to explore  
289 its genetic repertoire. Both applications that will help to improve our understanding in future  
290 studies on host-microbes' interactions and pelagic food webs.

291

## 292 **ACKNOWLEDGEMENTS**

293 The authors would like to thank the captain and crew of Kay-Kay II research vessel (Department  
294 of Oceanography, University of Concepcion, Chile) for ongoing support at sea.

## 295 **FIGURE LEGENDS**

296 **Table 1:** Phylogenetic affiliation, number, and percentage of sequences obtained from clones of  
297 sorted and DNA samples of the stomachs of *Euphausia mucronata* collected from Station 18.

298 **Figure 1:** Methodology diagram. Schematic summary of the methodological procedures used in  
299 this study to identify microorganisms in the *Euphausia mucronata* stomach. The diagram was  
300 created using the BioRender (biorender.com) web platform.

301 **Figure 2:** Flow cytometry plots from sorted seawater and *Euphausia mucronata* stomach  
302 samples collected from Station 18. Left panel: Detection of auto-fluorescent particles by using a  
303 two-laser approach. Red fluorescence was detected at 692 nm plus a 40 nm window, using a 532  
304 nm green excitation laser (x axes) and a 457 nm blue laser (y axes). A: 5-meter depth seawater  
305 sample. C: *E. mucronata* stomach sample. Right panel: Detection of SYBR Green I fluorescence  
306 for picoplankton enumeration. Green fluorescence was detected at 530 nm plus a 15 nm window,  
307 using a 488-nm blue excitation laser (y axes). Forward angle light scatter (FALS) was used to  
308 identify particles. B: seawater sample at 5 meters. D: *E. mucronata* stomach sample. Syn:  
309 *Synechococcus*, PEs: Photosynthetic eukaryotes. The black dashed line in Fig. 1D indicates the  
310 sorted population for molecular analysis. The 1  $\mu\text{m}$  beads are used as a size scale to identify the  
311 different populations of picoplankton.

312 **Figure 3:** Phylogenetic tree (maximum likelihood) of 16S rRNA gene sequences obtained from  
313 sorted samples of *Euphausia mucronata* stomachs (dotted square), showing the affiliation within  
314 the family Balneolaceae. The tree includes the genus *Aliifodinibius*, *Balneola*, *Fodinibius*,  
315 *Gracilimonas*, and *Rhodohalobacter*. OTUs affiliated to *Balneola* were highlighted in bold.  
316 Bootstrap values of >50% are plotted at the nodes with grey circles. The size of the circles  
317 ranged between 50% and 100%. The tree-scale bar indicates the percentage of sequence  
318 divergence. *Salinibacter ruber* M31 was included as an outgroup.

319

320

321 **REFERENCES**

- 322 **Aldunate M, De la Iglesia R, Bertagnolli, AD, Ulloa O. 2018.** Oxygen modulates bacterial  
323 community composition in the coastal upwelling waters off central Chile. *Deep Sea*  
324 *Research II* DOI 10.1016/j.dsr2.2018.02.001
- 325 **Amann RI, Binder BJ, Olson RJ, Chisholm SW, Devereux R, Stahl DA. 1990.**  
326 Combination of 16S rRNA-targeted oligonucleotide probes with flow cytometry for  
327 analyzing mixed microbial populations. *Applied and environmental microbiology*  
328 **56(6):**1919–1925.
- 329 **Antezana T. 2002.** Vertical distribution and diel migration of *Euphausia mucronata* in the  
330 oxygen minimum layer of the Humboldt Current. *Oceanography of the Eastern Pacific II*  
331 13–28.
- 332 **Antezana T. 2010.** *Euphausia mucronata*: A keystone herbivore and prey of the Humboldt  
333 Current system. *Deep Sea Research II* **57(7-8):**652–662 DOI 10.1016/j.dsr2.2009.10.014
- 334 **Böttjer D, Morales CE. 2005.** Microzooplankton grazing in a coastal embayment off  
335 Concepción, Chile, (~ 36° S) during non-upwelling conditions. *Journal of Plankton*  
336 *Research* **27(4):** 383-391.
- 337 **Clarke LJ, Suter L, King R, Bissett A, Deagle BE. 2019.** Antarctic krill are reservoirs for  
338 distinct Southern Ocean microbial communities. *Frontiers in microbiology* **9:** 3226
- 339 **Cui X, Zhu G, Liu H, Jiang G, Wang Y, Zhu W. 2016.** Diversity and function of the Antarctic  
340 krill microorganisms from *Euphausia superba*. *Scientific reports* **6:**36496 DOI  
341 10.1038/srep36496
- 342 **Darriba D, Taboada GL, Doallo R, Posad D. 2012.** jModelTest 2: more models, new heuristics  
343 and parallel computing. *Nature methods* **9(8):**772 DOI 10.1038/nmeth.2109

- 344 **Denner EB, Mark B, Busse H-J, Turkiewicz M, Lubitz W. 2001.** *Psychrobacter proteolyticus*  
345 sp. nov., a psychrotrophic, halotolerant bacterium isolated from the Antarctic krill  
346 *Euphausia superba* Dana, excreting a cold-adapted metalloprotease. *Systematic and*  
347 *applied microbiology* **24(1)**:44–53 DOI 10.1078/0723-2020-00006
- 348 **Donachie SP, Saborowski R, Peters G, Buchholz F. 1995.** Bacterial digestive enzyme activity  
349 in the stomach and hepatopancreas of *Meganyctiphanes norvegica* (M. Sars, 1857).  
350 *Journal of Experimental Marine Biology and Ecology* **188(2)**:151–165 DOI  
351 10.1016/0022-0981(94)00193-H
- 352 **Donachie SP, Zdanowski MK. 1998.** Potential digestive function of bacteria in krill *Euphausia*  
353 *superba* stomach. *Aquatic microbial ecology* **14(2)**:129–136 DOI 10.3354/ame014129
- 354 **Engel P, Stepanauskas R, Moran NA. 2014.** Hidden diversity in honey bee gut symbionts  
355 detected by single-cell genomics. *PLoS genetics* **10(9)**:e1004596 DOI  
356 10.1371/journal.pgen.1004596
- 357 **Fevolden SE Eidsa G. 1981.** Bacteriological characteristics of Antarctic krill (Crustacea,  
358 Euphausiacea). *Sarsia* **66(1)**:77–82 DOI 10.1080/00364827.1981.10414524
- 359 **Gonzalez HE, Daneri G, Iriarte JL, Yannicelli B, Menschel E, Barria C, Pantoja S,**  
360 **Lizarraga L. 2009.** Carbon fluxes within the epipelagic zone of the Humboldt Current  
361 system off Chile: The significance of euphausiids and diatoms as key functional groups  
362 for the biological pump. *Progress in Oceanography* **83(1-4)**:217–227 DOI  
363 10.1016/j.pocean.2009.07.036
- 364 **Gonzalez RR, Quiñones RA. 2002.** Ldh activity in *Euphausia mucronata* and *Calanus*  
365 *chilensis*: implications for vertical migration behaviour. *Journal of Plankton Research*  
366 **24(12)**:1349–1356 DOI 10.1093/plankt/24.12.1349



- 367 **Green DH, Echavarri-Bravo V, Brennan D, Hart MC. 2015.** Bacterial diversity associated  
368 with the coccolithophorid algae *Emiliana huxleyi* and *Coccolithus pelagicus* f. *braarudii*.  
369 *BioMed Research International* ID 194540 DOI 10.1155/2015/194540
- 370 **Iriarte JL, Vargas CA, Tapia FJ, Bermúdez R, Urrutia RE. 2012.** Primary production and  
371 plankton carbon biomass in a river-influenced upwelling area off Concepción, Chile.  
372 *Progress in Oceanography* **92**: 97-109.
- 373 **Kawaguchi S, Toda T. 1997.** Discovery of ciliates reproducing in the gut of Antarctic krill.  
374 *Polar Biology* **18(2)**:158–160 DOI 10.1007/s003000050171
- 375 **Kelly M, Lukaschewsky S, Anderson C. 1978.** Bacterial flora of Antarctic krill (*Euphausia*  
376 *superba*) and some of their enzymatic properties. *Journal of Food Science* **43(4)**:1196–  
377 1197 DOI 10.1111/j.1365-2621.1978.tb15267.x
- 378 **Koch C, Gunther S, Desta AF, Hubschmann T, Muller S. 2013.** Cytometric fingerprinting for  
379 analyzing microbial intracommunity structure variation and identifying subcommunity  
380 function. *Nature Protocols* **8(1)**:190 DOI 10.1038/nprot.2012.149
- 381 **Letunic I, Bork P. 2006.** Interactive Tree of Life (iTOL): an online tool for phylogenetic tree  
382 display and annotation. *Bioinformatics* **23(1)**:127–128 DOI  
383 10.1093/bioinformatics/btl529
- 384 **Marie D, Partensky F, Jacquet S, Vaulot D. 1997.** Enumeration and cell cycle analysis of  
385 natural populations of marine picoplankton by flow cytometry using the nucleic acid stain  
386 SYBR Green I. *Applied and environmental microbiology* **63(1)**:186–193 PMC 1389098
- 387 **Mattick JS. 2002.** Type IV pili and twitching motility. *Annual Reviews in Microbiology*  
388 **56(1)**:289–314 DOI 10.1146/annurev.micro.56.012302.160938

- 389 **Moisander PH, Sexton AD, Daley MC. 2015.** Stable associations masked by temporal  
390 variability in the marine copepod microbiome. *PloS one* **10(9)**:e0138967 DOI  
391 10.1371/journal.pone.0138967
- 392 **Muyzer G, De Waal EC, Uitterlinden AG. 1993.** Profiling of complex microbial populations  
393 by denaturing gradient gel electrophoresis analysis of polymerase chain reaction-  
394 amplified genes coding for 16S rRNA. *Applied and environmental microbiology*  
395 **59(3)**:695–700 PMID 7683183
- 396 **Muyzer G, Smalla K. 1998.** Application of denaturing gradient gel electrophoresis (DGGE) and  
397 temperature gradient gel electrophoresis (TGGE) in microbial ecology. *Antonie van*  
398 *Leeuwenhoek* **73(1)**:127–141 PMID 9602286
- 399 **Nicol S, Foster J. 2016.** The fishery for Antarctic krill: its current status and management  
400 regime. In *Biology and ecology of Antarctic krill*, pages 387–421 Springer DOI  
401 10.1007/978-3-319-29279-3\_11
- 402 **Rakusa-Suszczewski S. 1988.** Bacteria on the body surface and in the stomach of krill  
403 (*Euphausia superba* Dana) (BIOMASS III). *Polish Polar Research* **2(9)**:409–412
- 404 **Ramirez-Flandes S, Ulloa O. 2008.** Bosque: integrated phylogenetic analysis software.  
405 *Bioinformatics* **24(21)**:2539–2541 DOI 10.1093/bioinformatics/btn466
- 406 **Riquelme-Bugueño R, Correa-Ramirez M, Escribano R, Nuñez S, Hormazabal S. 2015.**  
407 Mesoscale variability in the habitat of the Humboldt Current krill, spring 2007. *Journal*  
408 *of Geophysical Research: Oceans* **120(4)**:2769–2783 DOI 10.1002/2014JC010460
- 409 **Riquelme-Bugueño R, Escribano R, Gomez-Gutierrez J. 2013.** Somatic and molt production  
410 in *Euphausia mucronata* off central-southern Chile: the influence of coastal upwelling  
411 variability. *Marine Ecology Progress Series* **476**:39–57 DOI 10.3354/meps10142

- 412 **Riquelme-Bugueño R, Gomez-Gutierrez J, Escribano R, Ruz P, Hidalgo P, Schneider W.**  
413 **2016a.** First measurements of euphausiid growth rates in the northern Humboldt Current  
414 (23°S). *Revista de Biología Marina y Oceanografía* **51(2)**:435-440 DOI 10.4067/S0718-  
415 19572016000200020
- 416 **Riquelme-Bugueño R, Núñez S, Jorquera E, Valenzuela L, Escribano R, Hormazabal S.**  
417 **2012.** The influence of upwelling variation on the spatially-structured euphausiid  
418 community off central-southern Chile in 2007–2008. *Progress in Oceanography* **92-**  
419 **95**:146–165 DOI 10.1016/j.pocean.2011.07.003
- 420 **Riquelme-Bugueño R, Silva-Aburto J, Escribano R, Peterson WT, Schneider W. 2016b.**  
421 Growth of the Humboldt Current krill in the upwelling zone off central Chile. *Journal of*  
422 *Marine Systems* **163**:1–11 DOI 10.1016/j.jmarsys.2016.06.001
- 423 **Rosana ARR, Orata FD, Xu Y, Simkus DN, Bramucci AR, Boucher Y, Case RJ. 2016.** Draft  
424 genome sequences of seven bacterial strains isolated from a polymicrobial culture of  
425 coccolith-bearing (C-Type) *Emiliana huxleyi* M217. *Genome announcements*  
426 **4(4)**:e00673–16 DOI 10.1128/genomeA.00673-16
- 427 **Schmidt K, Atkinson A. 2016.** Feeding and Food Processing in Antarctic Krill (*Euphausia*  
428 *superba* Dana). In: Siegel V. (eds) *Biology and Ecology of Antarctic Krill. Advances in*  
429 *Polar Ecology*. Springer, Cham. DOI 10.1007/978-3-319-29279-3\_5
- 430 **Shoemaker KM, Moisander PH. 2017.** Seasonal variation in the copepod gut microbiome in  
431 the subtropical North Atlantic Ocean. *Environmental microbiology* **19(8)**:3087–3097  
432 DOI 10.1111/1462-2920.13780

- 433 **Sobarzo M, Bravo L, Donoso D, Garces-Vargas J, Schneider W. 2007.** Coastal upwelling and  
434 seasonal cycles that influence the water column over the continental shelf off central  
435 Chile. *Progress in Oceanography* **75(3)**:363–382 DOI 10.1016/j.pocean.2007.08.022
- 436 **Stevens H, Ulloa O. 2008.** Bacterial diversity in the oxygen minimum zone of the eastern  
437 tropical south pacific. *Environmental microbiology* **10(5)**:1244–1259 DOI  
438 10.1111/j.1462-2920.2007.01539.x
- 439 **Tang KW, Turk V, Grossart HP. 2010.** Linkage between crustacean zooplankton and aquatic  
440 bacteria. *Aquatic Microbial Ecology* **61(3)**: 261-277.
- 441 **Thomas F, Hehemann J-H, Rebuffet E, Czjzek M, Michel G. 2011.** Environmental and gut  
442 bacteroidetes: the food connection. *Frontiers in Microbiology* **2**:93 DOI  
443 10.3389/fmicb.2011.00093
- 444 **Tuson HH, Weibel DB. 2013.** Bacteria–surface interactions. *Soft matter* **9(17)**:4368–4380 DOI  
445 10.1039/C3SM27705D
- 446 **Ullrich B, Storch V, Marschall HP. 1991.** Microscopic anatomy, functional morphology, and  
447 ultrastructure of the stomach of *Euphausia superba* Dana (Crustacea, Euphausiacea).  
448 *Polar Biology* **11(3)**:203–211 DOI 10.1007/BF00240209

**Table 1**

| Affiliation<br>( <b>phylum/genus</b> ) | N of sequences from |                           | % of the total of sequences from |                           |
|----------------------------------------|---------------------|---------------------------|----------------------------------|---------------------------|
|                                        | Sorting             | Total DNA from<br>stomach | Sorting                          | Total DNA from<br>stomach |
| <b>Proteobacteria</b>                  |                     |                           |                                  |                           |
| <i>Pseudomonas</i>                     |                     | 1                         |                                  | 1.14                      |
| <i>Vibrio</i>                          |                     | 1                         |                                  | 1.14                      |
| <i>Lysobacter</i>                      |                     | 1                         |                                  | 1.14                      |
| <i>Halioglobus</i>                     |                     | 3                         |                                  | 3.40                      |
| <i>Luminiphilus</i>                    | 2                   | 1                         | 2.40                             | 1.14                      |
| <i>Haliaea</i>                         |                     | 1                         |                                  | 1.14                      |
| <i>Lautropia</i>                       |                     | 1                         |                                  | 1.14                      |
| <i>Tateyamaria</i>                     |                     | 5                         |                                  | 5.68                      |
| <i>Sulfitobacter</i>                   |                     | 3                         |                                  | 3.40                      |
| <i>Roseobacter</i>                     |                     | 2                         |                                  | 2.27                      |
| <i>Paracoccus</i>                      |                     | 2                         |                                  | 2.27                      |
| <i>Jannaschia</i>                      |                     | 1                         |                                  | 1.14                      |
| <i>Citreimonas</i>                     |                     | 1                         |                                  | 1.14                      |
| <i>Pseudoruegeria</i>                  |                     | 1                         |                                  | 1.14                      |
| <i>Aliiroseovarius</i>                 |                     | 1                         |                                  | 1.14                      |
| <i>Geoalkalibacter</i>                 |                     | 2                         |                                  | 2.27                      |
| <b>Actinobacteria</b>                  |                     |                           |                                  |                           |
| <i>Ilumatobacter</i>                   |                     | 5                         |                                  | 5.68                      |
| <i>Cutibacterium</i>                   |                     | 1                         |                                  | 1.14                      |
| <b>Firmicutes</b>                      |                     |                           |                                  |                           |
| <i>Staphylococcus</i>                  |                     | 1                         |                                  | 1.14                      |
| <i>Geobacillus</i>                     |                     | 1                         |                                  | 1.14                      |
| <b>Balneolata</b>                      |                     |                           |                                  |                           |
| <i>Balneola</i>                        | 80                  |                           | 96.38                            |                           |
| <b>Bacteroidetes</b>                   |                     |                           |                                  |                           |
| <i>Polaribacter</i>                    | 1                   |                           | 1.20                             |                           |
| <b>Cyanobacteria</b>                   |                     |                           |                                  |                           |
| <i>Synechococcus</i>                   |                     | 18                        |                                  | 20.45                     |
| <i>Prochlorococcus</i>                 |                     | 35                        |                                  | 39.77                     |

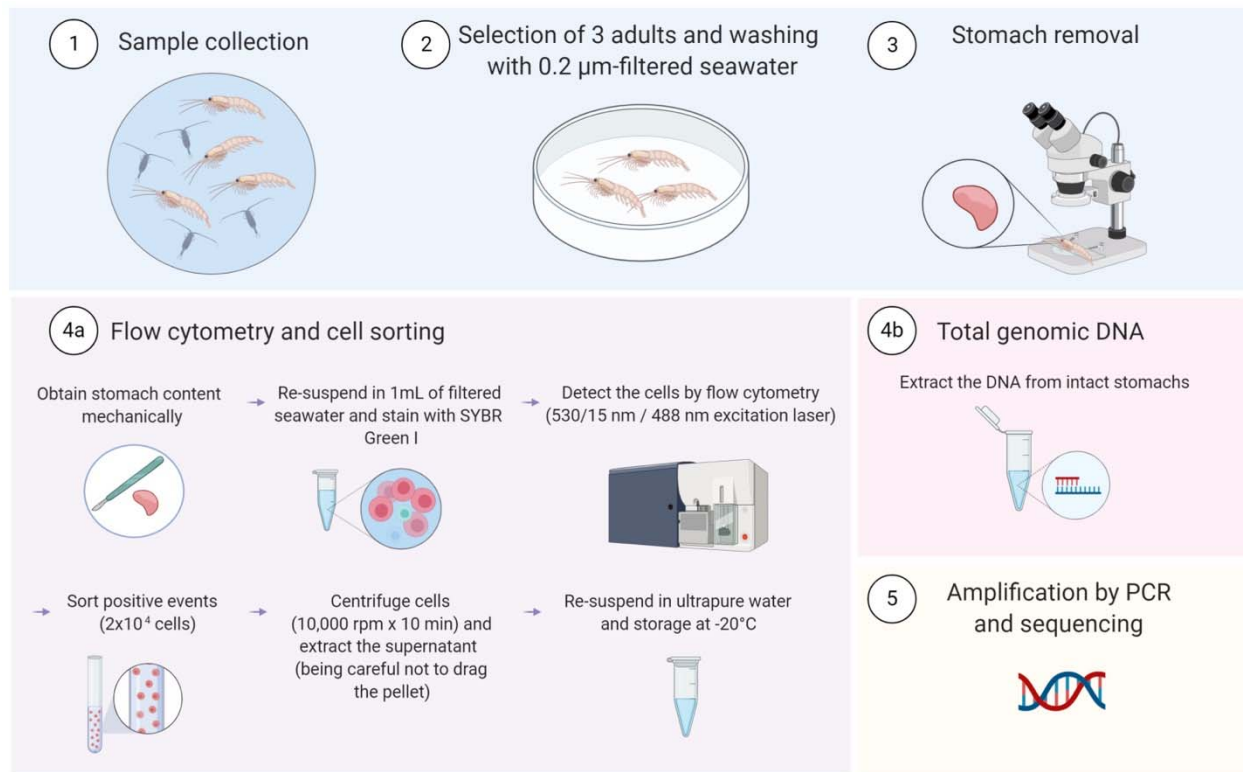

**Figure 1**

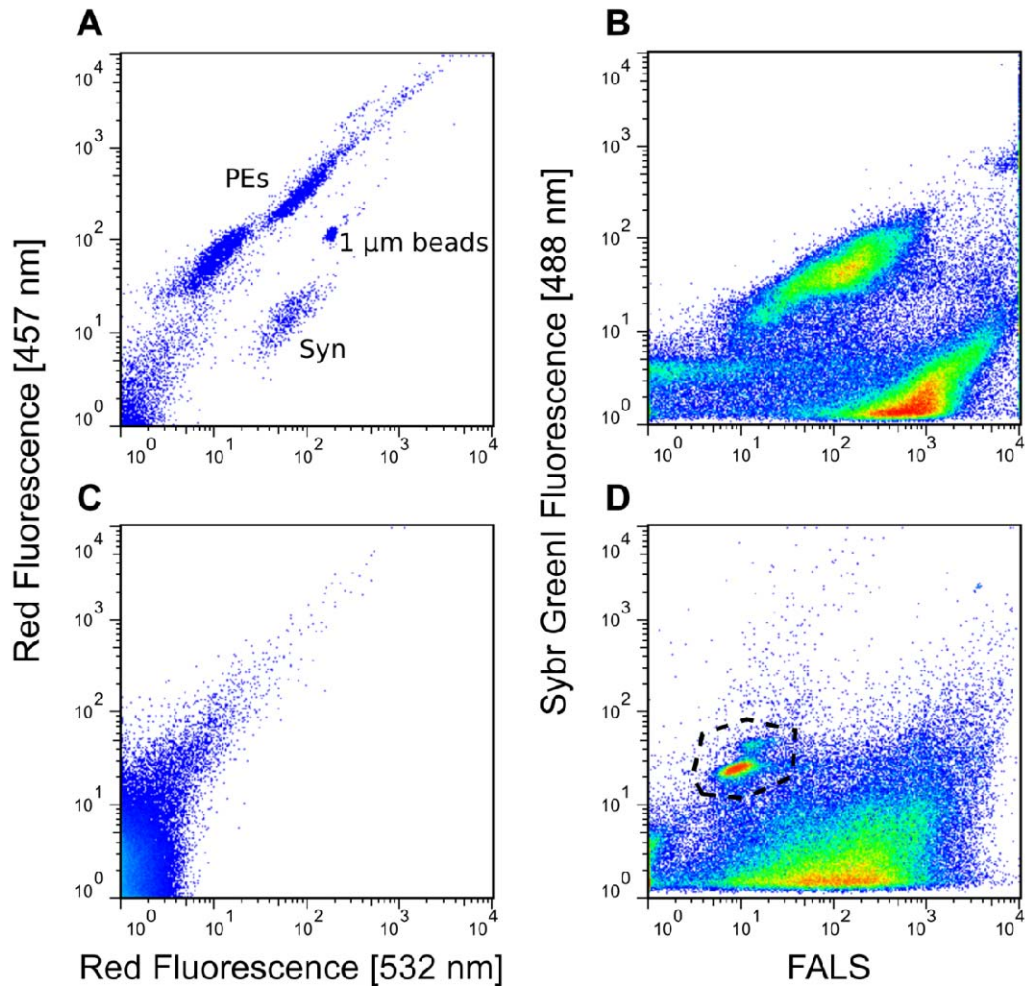

**Figure 2**

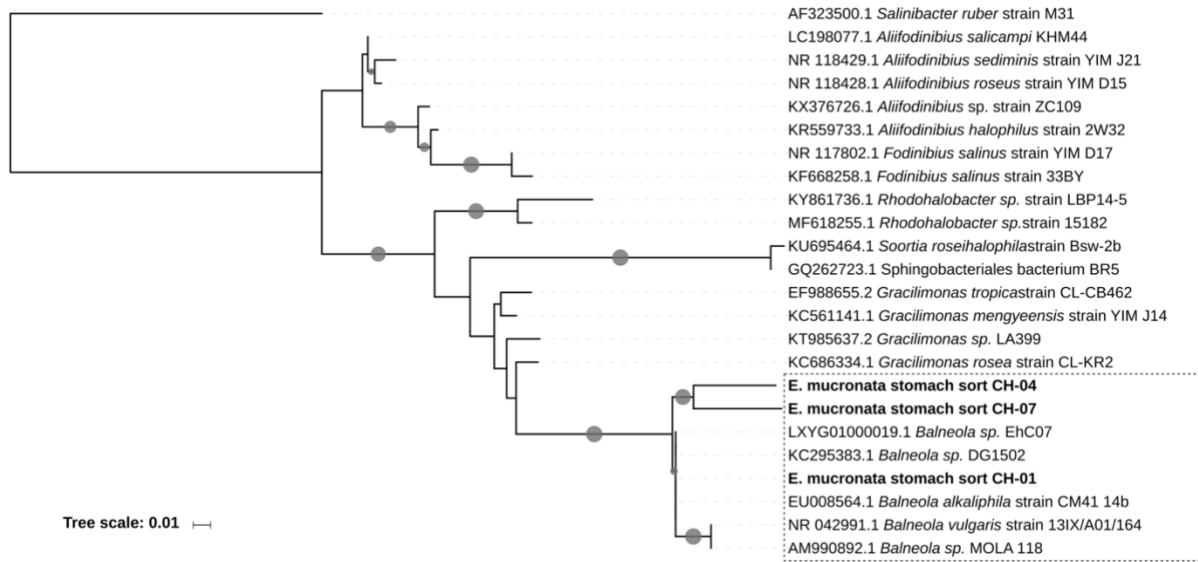

**Figure 3**
